# Supplementary material for: Inhibitors of the Actin-Bundling Protein Fascin-1 Developed for Tumor Therapy Attenuate the T-Cell Stimulatory Properties of Dendritic Cells
Source: MDPI journal article supplement (doi:10.3390/cancers14112738), 2022-05-31
Supplement: s1 [file s1]

# Inhibitors of the Actin-Bundling Protein Fascin-1 Developed for Tumor Therapy Attenuate the T-Cell Stimulatory Properties of Dendritic Cells

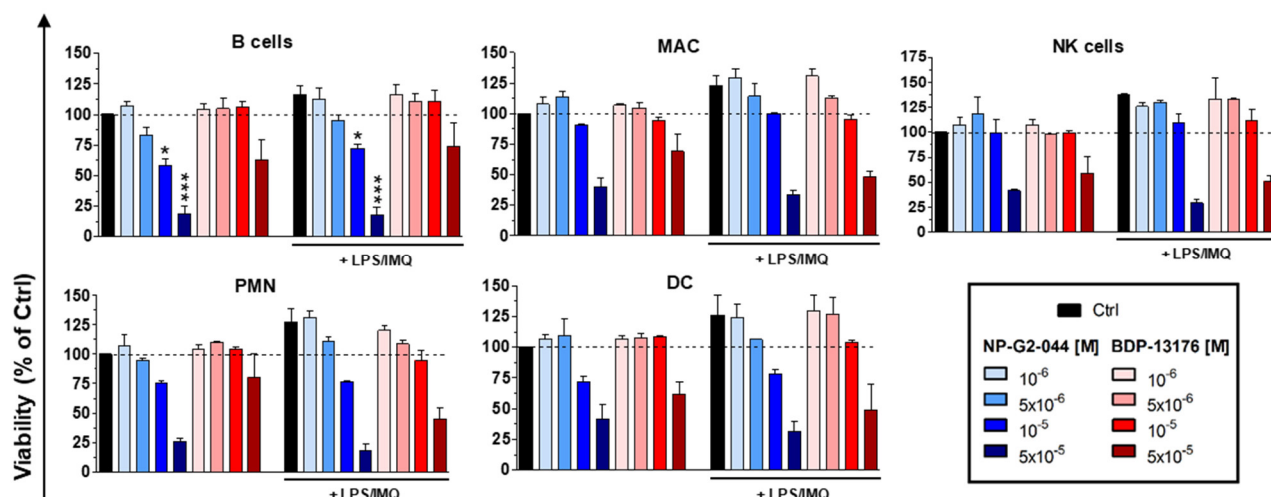

**Figure S1.** NP-G2-044 at high concentration attenuates the viability of splenic B cells. Spleen cells were incubated over night with Fscn1 inhibitors and stimulated as described (see Figure 1). Splenic immune cell populations were delineated by sequential gating as described [1]. Viability of splenic immune cell populations was assessed by flow cytometric analysis. Graphs denote the frequency of FVD-negative viable cells (mean±SEM of 2–6 experiments), normalized to the Ctrl. Graphs denote MFI (mean±SEM of 6 experiments) given relative to expression by the control (Ctrl) group. Statistical differences versus \* Ctrl are indicated (one way ANOVA, Tukey test). \*  $p < 0.05$ , \*\*\*  $p < 0.001$ .

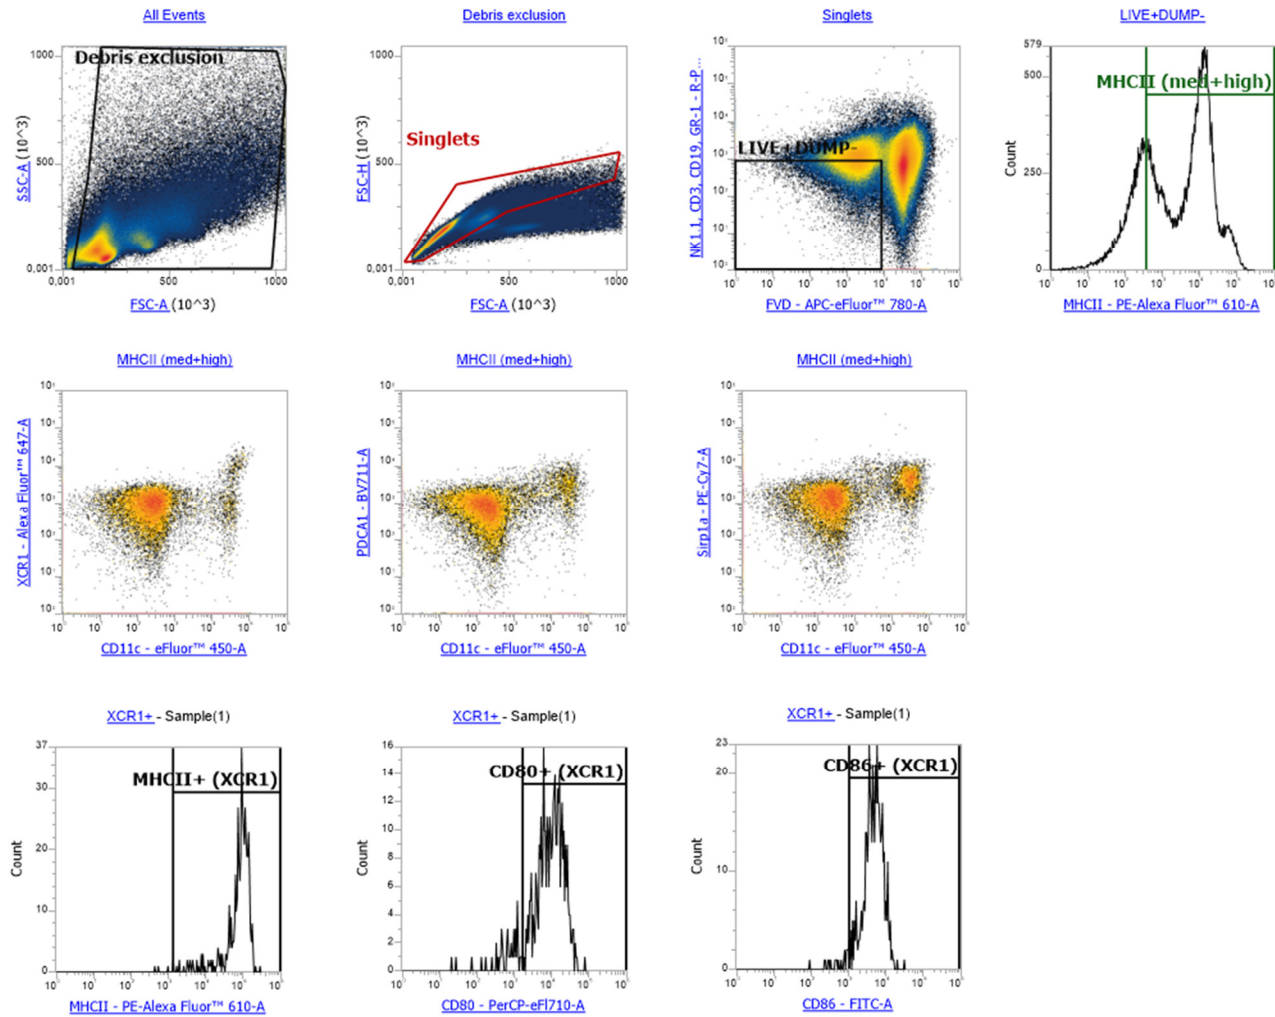

**Figure S2.** Gating strategy of splenic DC populations. After exclusion of debris, doublets, dead cells and non-DC (CD19<sup>+</sup> B cells, CD3<sup>+</sup> T cells, NK1.1<sup>+</sup> NK cells and GR-1<sup>+</sup> myeloid cell types gated out [‘dump channel’]), splenic DC populations were identified according to coexpression of CD11c and XCR1 (cDC1), CD172/SIRPα (cDC2) and CD317/PDCA1 (pDC). For each DC population, expression intensities of MHCII, CD80 and CD86 were tested.

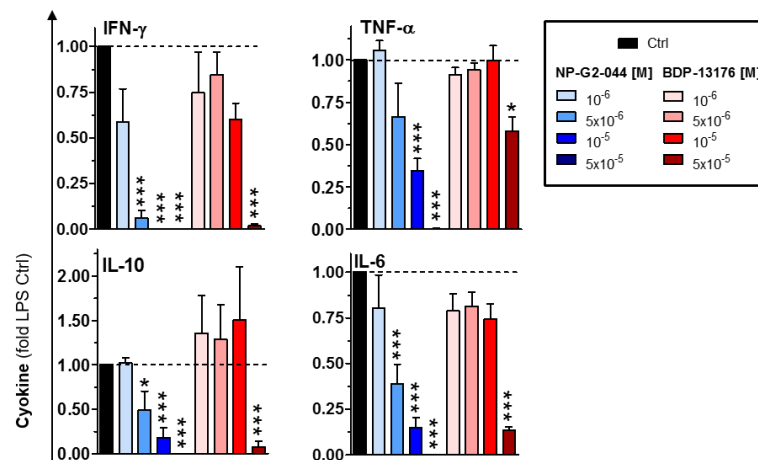

**Figure S3.** NP-G2-044 affects cytokine production of stimulated spleen cells. Spleen cells were incubated over night with NP-G2-044 and stimulated as described (see Figure 1). Cytokine concentrations in culture supernatants were determined by CBA (mean  $\pm$  SEM of 3–4 experiments). Statistical differences versus \* Ctrl are indicated (one way ANOVA, Tukey test). \*  $p < 0.05$ , \*\*\*  $p < 0.001$ .

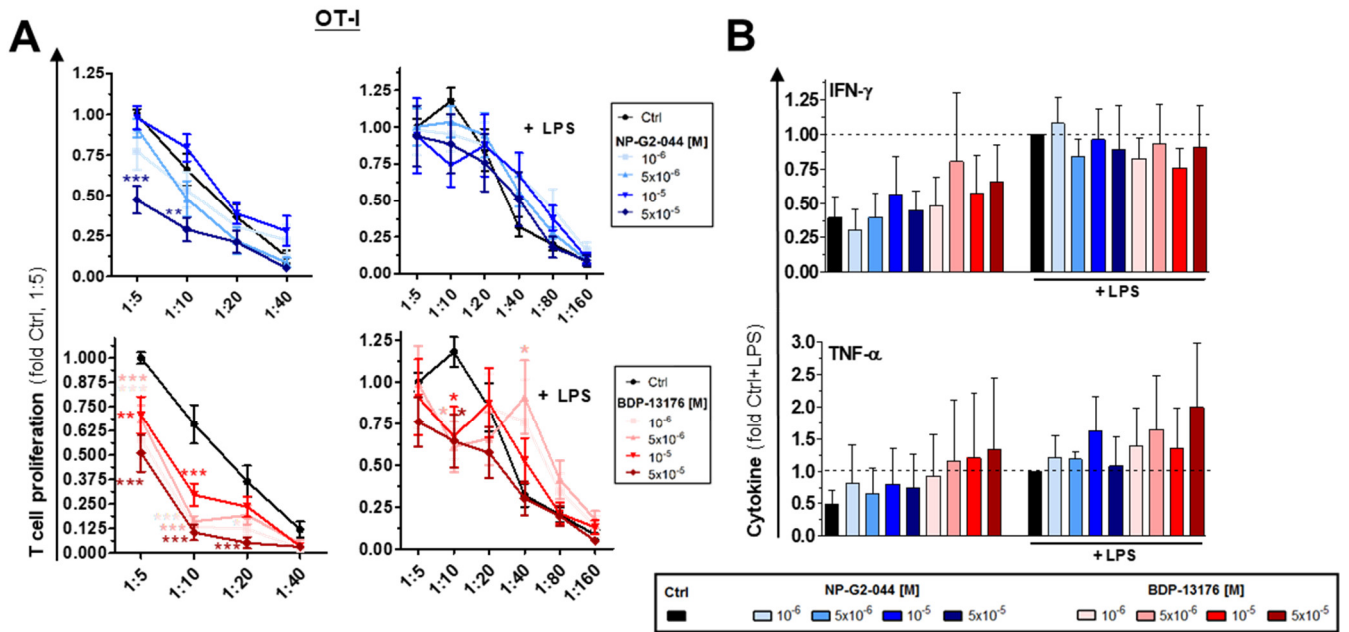

**Figure S4.** BMDC pretreated with Fcsc1 inhibitors confer lower CD8<sup>+</sup> T cell stimulatory capacity. (A,B) BMDC were treated, incubated and co-cultured as described (see Figure 4) with CD8<sup>+</sup> (OT-I) T cells. (A) Proliferation of CD8<sup>+</sup> T cells was assessed by incorporation of <sup>3</sup>H-thymidin applied for the last 16 h of 3-4 days of coculture. Data denote the mean±SEM of 3-4 compiled experiments performed in triplicates and given relative to the according Ctrl condition (1:5). (B) Prior to application of <sup>3</sup>H-thymidine aliquots of DC/T cell coculture supernatants (1:5) were retrieved and cytokine contents in CD8<sup>+</sup> cocultures were assayed by CBA. Data denote the mean±SEM of 3-4 experiments given relative to Ctrl+LPS. (A) Statistical differences versus \*Ctrl are indicated (one way ANOVA, Tukey test). \*  $p < 0.05$ , \*\*  $p < 0.01$ , \*\*\*  $p < 0.001$ .

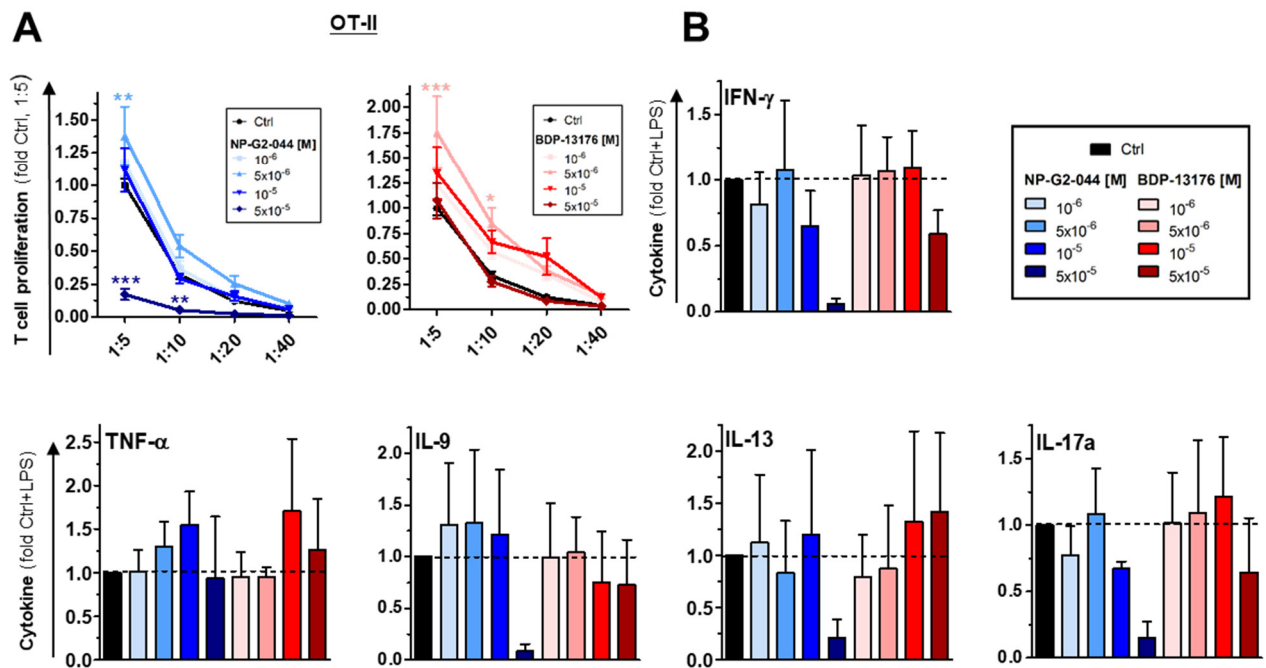

**Figure S5.** BMDC pretreated with Fcsc1 inhibitors confer lower CD4<sup>+</sup> T cell stimulatory capacity. (A,B) BMDC were treated without final LPS stimulation and co-cultured as described (see Figure 4) with CD4<sup>+</sup> (OT-II) T cells. (A) Proliferation of CD4<sup>+</sup> T cells was assessed by incorporation of <sup>3</sup>H-

thymidin applied for the last 16 h of 3–4 days of coculture. Data denote the mean±SEM of 2–3 compiled experiments performed in triplicates and given relative to the according Ctrl condition (1:5). (B) Prior to application of <sup>3</sup>H-thymidine aliquots of DC/T cell coculture supernatants (1:5) were retrieved and cytokine contents in CD4<sup>+</sup> cocultures were assayed by CBA. Data denote the mean±SEM of 4–6 experiments given relative to Ctrl. (A) Statistical differences versus \* Ctrl are indicated (one way ANOVA, Tukey test). \*\*  $p < 0.01$ , \*\*\*  $p < 0.001$ .

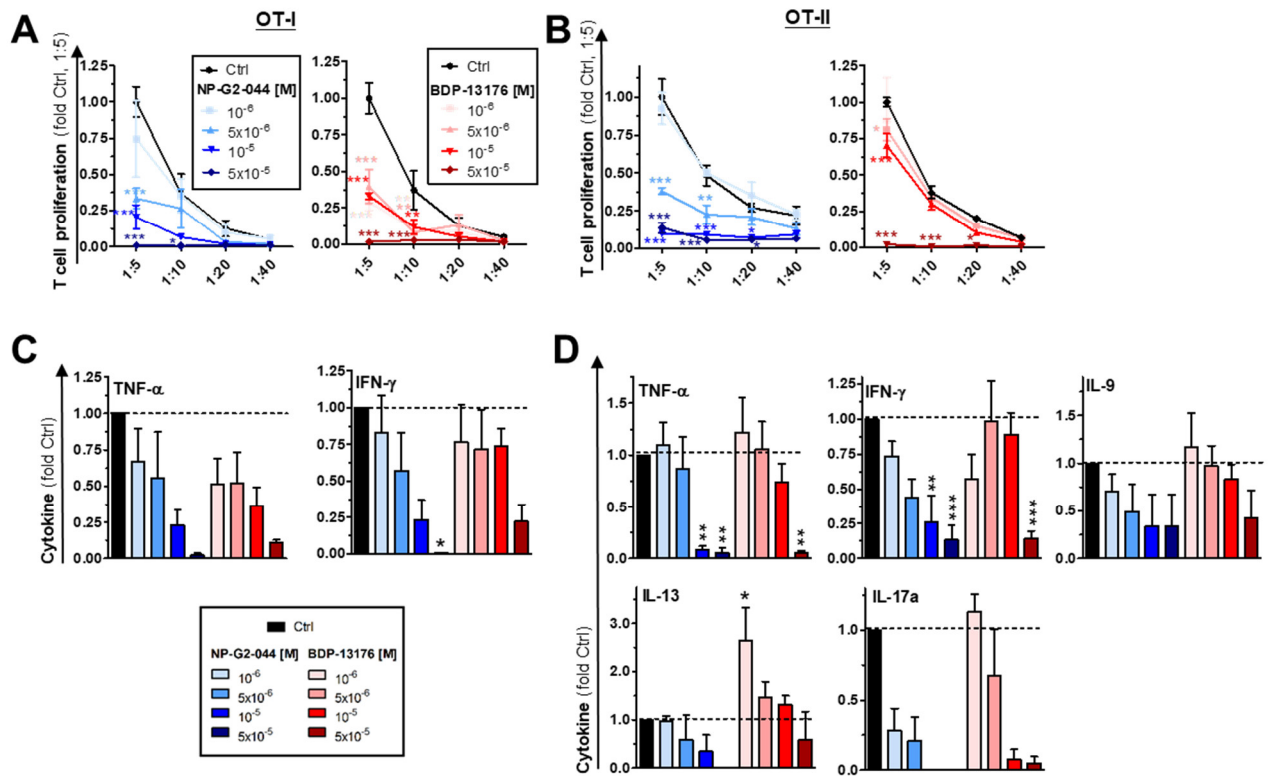

**Figure S6.** Application of Fcsc1 inhibitors during DC/T cell coculture results in impaired T cell proliferation. (A–D) BMDC were incubated with OVA protein (5 µg/mL) and treated 3 h later with Fcsc1 inhibitors as indicated. On the next day, samples were harvested, washed and serially titrated numbers of DC were cocultured with immunomagnetically sorted OVA peptide-specific CD8<sup>+</sup> (OT-I) (A, B) and CD4<sup>+</sup> (OT-II) (C, D) T cells (each  $5 \times 10^4/100 \mu\text{l}$ ) in triplicates in 96 well plates. (A, C) Proliferation of CD8<sup>+</sup> (A) and CD4<sup>+</sup> (C) T cells was assessed by incorporation of <sup>3</sup>H-thymidine applied for the last 16 h of 3–4 days of coculture. Data denote the mean±SEM of 2 compiled experiments performed in triplicate and given relative to the according Ctrl condition (1:5). (B, D) Prior to application of <sup>3</sup>H-thymidine aliquots of DC/T cell coculture supernatants (1:5) were retrieved and cytokine contents in (B) CD8<sup>+</sup> and (D) CD4<sup>+</sup> cocultures were assayed by CBA. Data denote the (mean±SEM of 3–5 experiments given relative to Ctrl. (A–D) Statistical differences versus \* Ctrl are indicated (one way ANOVA, Tukey test). \*  $p < 0.05$ , \*\*  $p < 0.01$ , \*\*\*  $p < 0.001$ .

## References

1. Bednarczyk, M.; Medina-Montano, C.; Fittler, F.J.; Stege, H.; Roskamp, M.; Kuske, M.; Langer, C.; Vahldieck, M.; Montermann, E.; Tubbe, I.; et al. Complement-Opsonized Nano-Carriers Are Bound by Dendritic Cells (DC) via Complement Receptor (CR)3, and by B Cell Subpopulations via CR-1/2, and Affect the Activation of DC and B-1 Cells. *Int. J. Mol. Sci.* **2021**, *22*, 2869. <https://doi.org/10.3390/ijms22062869>.
